# Supplementary material for: The Effect of Potassium Inclusion in a Silver Catalyst for N2O-Mediated Oxidation of Soot in Oxidising Exhaust Gases
Source: MDPI journal article supplement (doi:10.3390/catal12070753), 2022-07-07
Supplement: s1 [file s1]

## Supplementary Material

### CO<sub>2</sub> Trace Investigations

2%Ag-20%K/CZA was heated to 300 °C under flowing N<sub>2</sub> (200 cm<sup>3</sup> min<sup>-1</sup>) while CO<sub>2</sub> evolution was monitored by FTIR gas analysis. The temperature was held at 300 °C until the CO<sub>2</sub> concentration decreased to 0 ppm (Figure S1). The reactor was then cooled to 125 °C, before a NO<sub>x</sub> reduction test (using NH<sub>3</sub> as reductant) was carried out (Figure S2).

As Figure S2b shows, following the heat treatment, there was no CO<sub>2</sub> evolution below 200 °C and the CO<sub>2</sub> peak seen at 300 °C in Figure S2a was no longer present. We assign the CO<sub>2</sub> peak in Figure S2a to the transformation from a mixture of hydrated K<sub>2</sub>CO<sub>3</sub> and KHCO<sub>3</sub> into well-defined K<sub>2</sub>CO<sub>3</sub>.

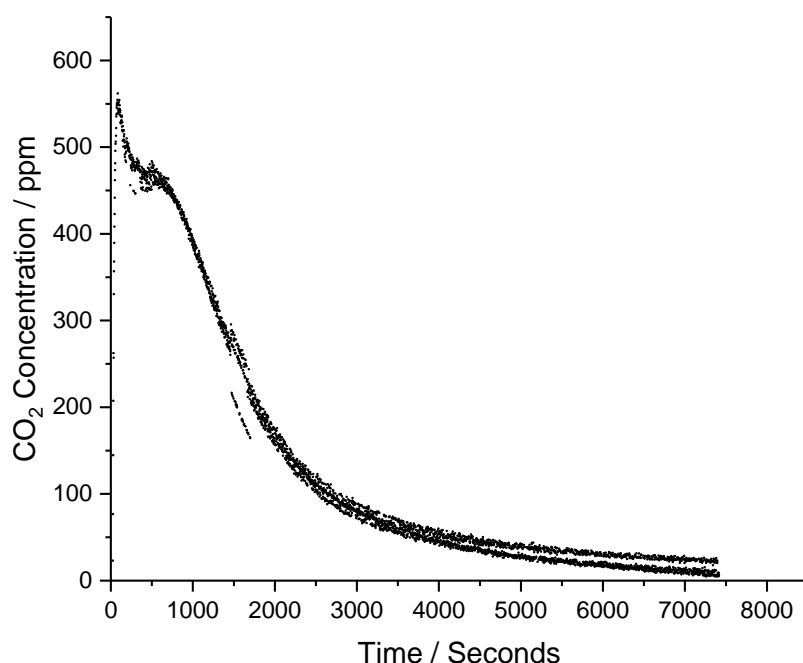

**Figure S1.** Evolution of CO<sub>2</sub> during heat treatment of 2%Ag-20%K/CZA at 300 °C.

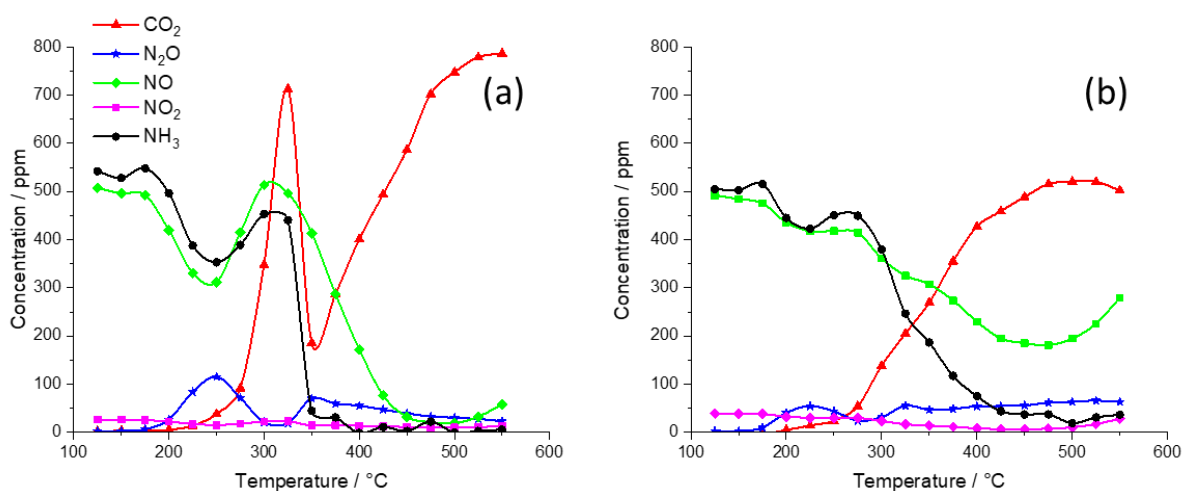

**Figure S2.** NO<sub>x</sub> reduction performance of 2%Ag-20%K/CZA (a) before and (b) after heat treatment at 300 °C.

Figure S4b shows that after pre-treatment of the catalyst under flowing  $N_2$  at 500 °C,  $CO_2$  is still formed at temperatures between 300 and 550 °C during testing. We attribute this to nitration of the potassium, *i.e.* transformation of  $K_2CO_3$  to  $KNO_3$ , which is also seen in Figure S2b.

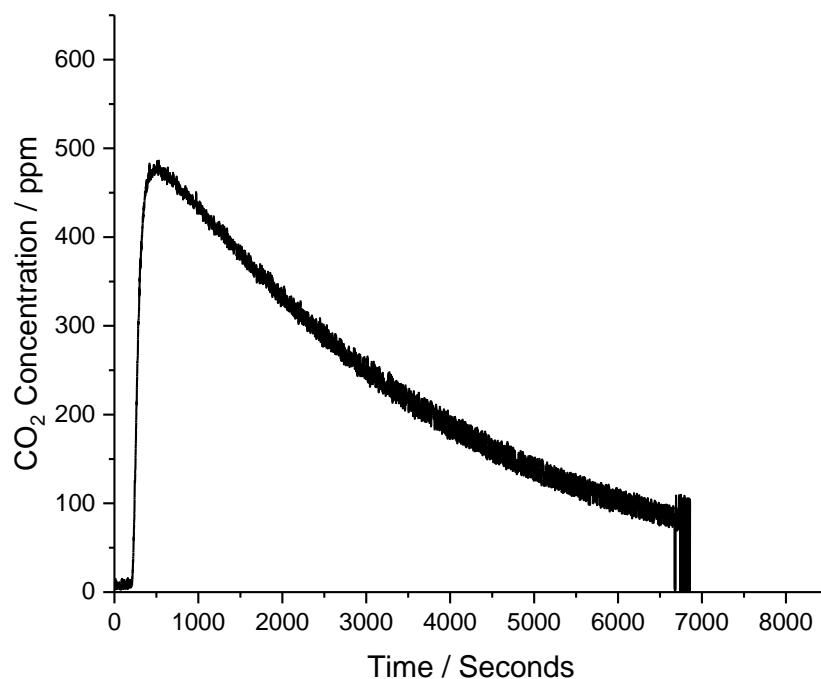

**Figure S3.** Evolution of  $CO_2$  during heat treatment of 2%Ag-20%K/CZA at 500 °C.

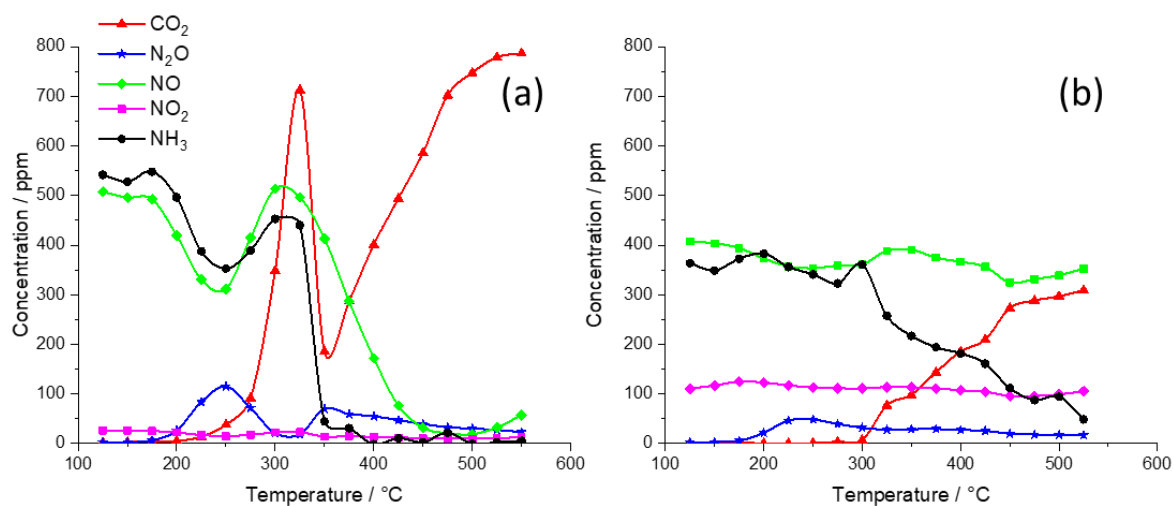

**Figure S4.**  $NO_x$  reduction performance of 2%Ag-20%K/CZA (a) before and (b) after heat treatment at 500 °C.

## Temperature-programmed XRD

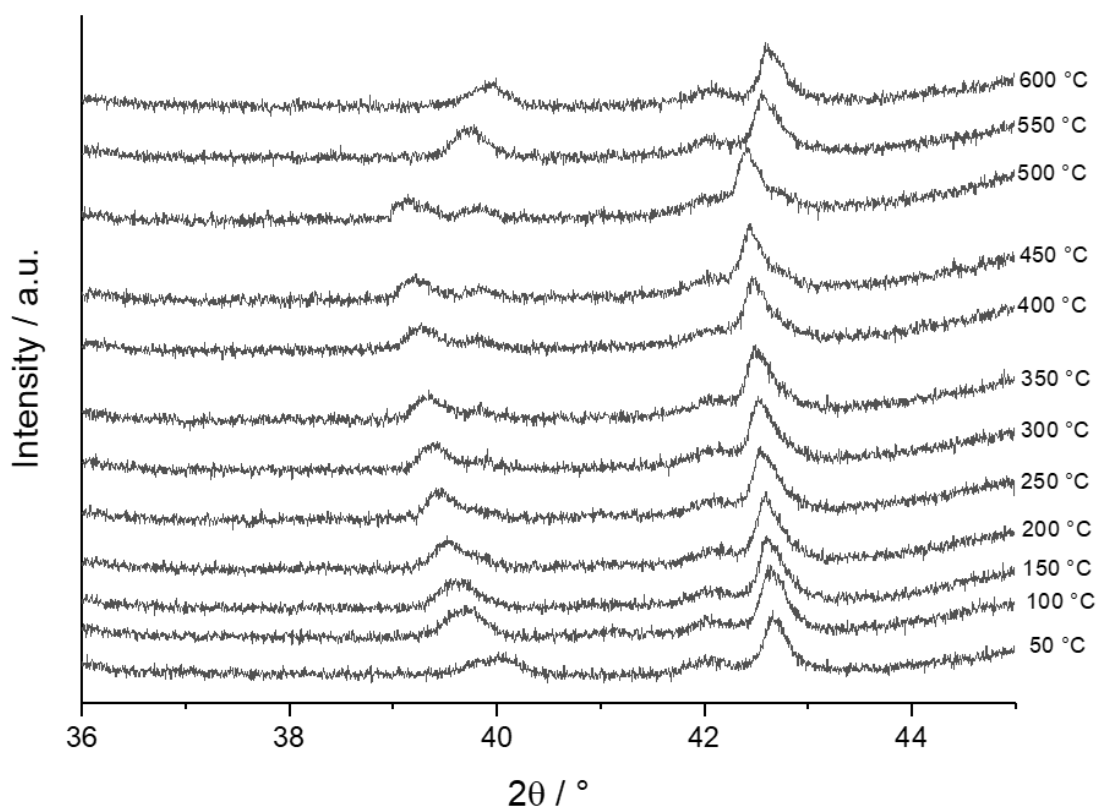

Figure S5. CZA

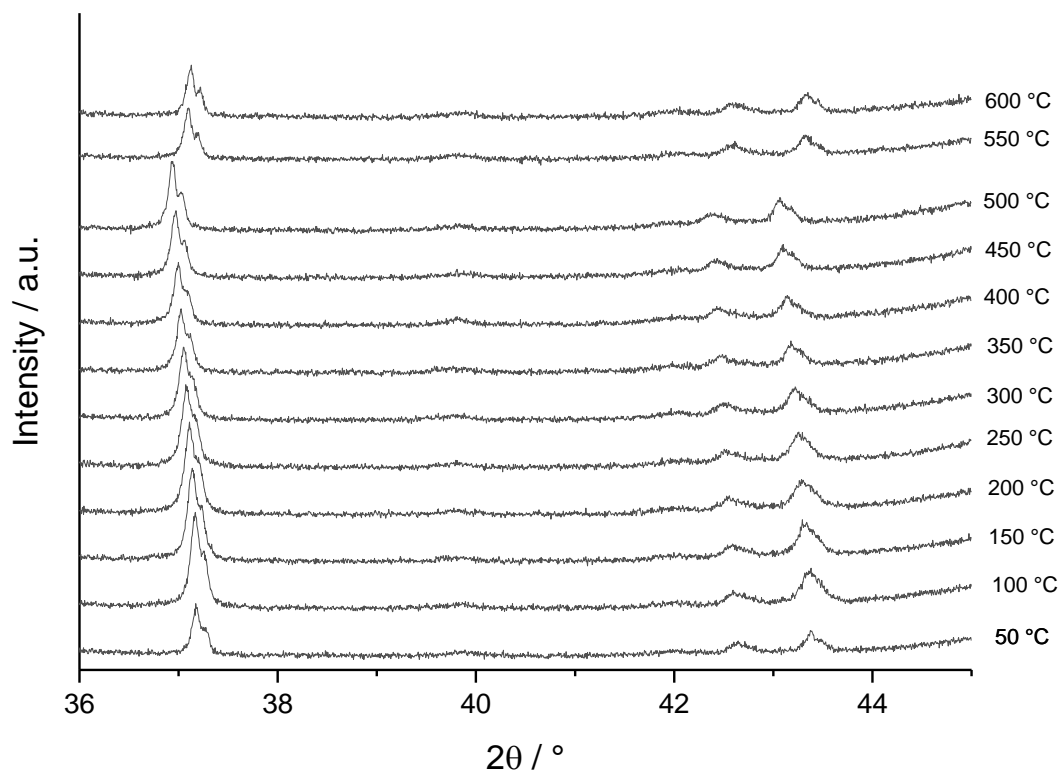

Figure S6. 2%Ag-2%K/CZA

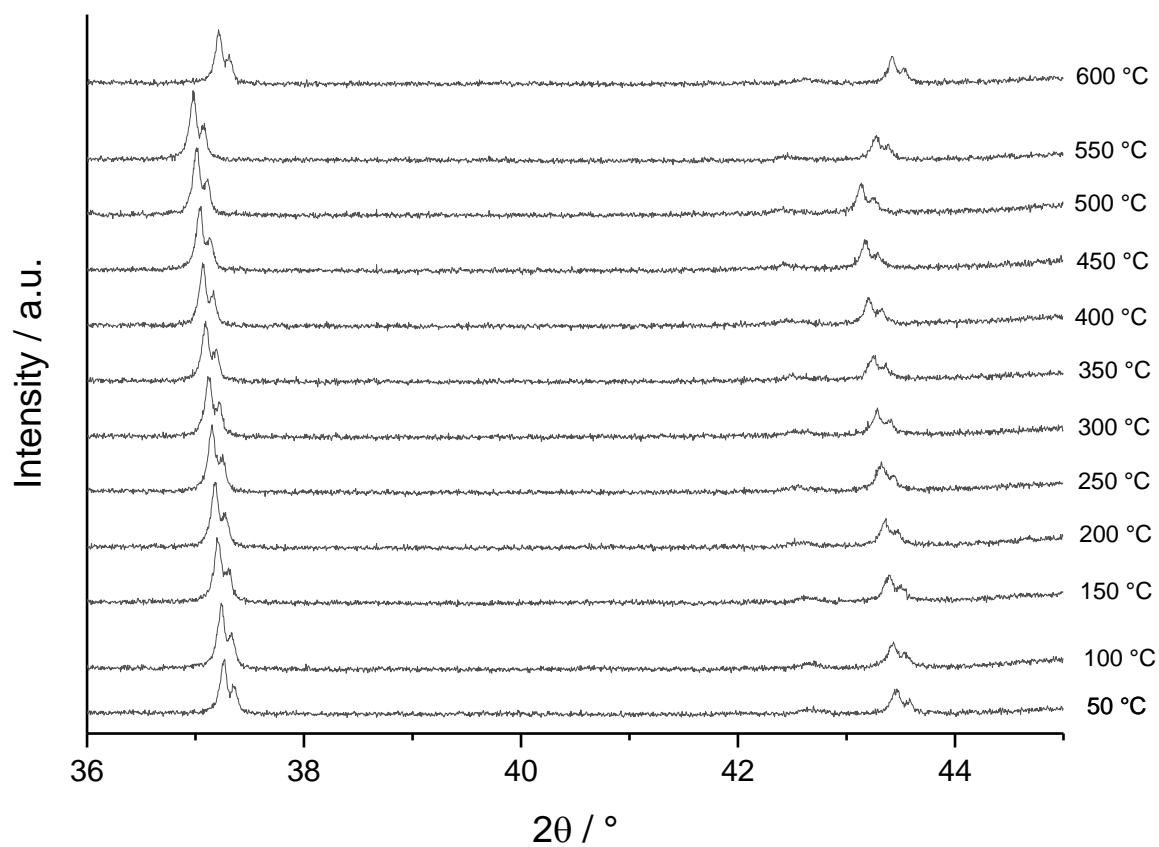

Figure S7. 2%Ag-5%K/CZA

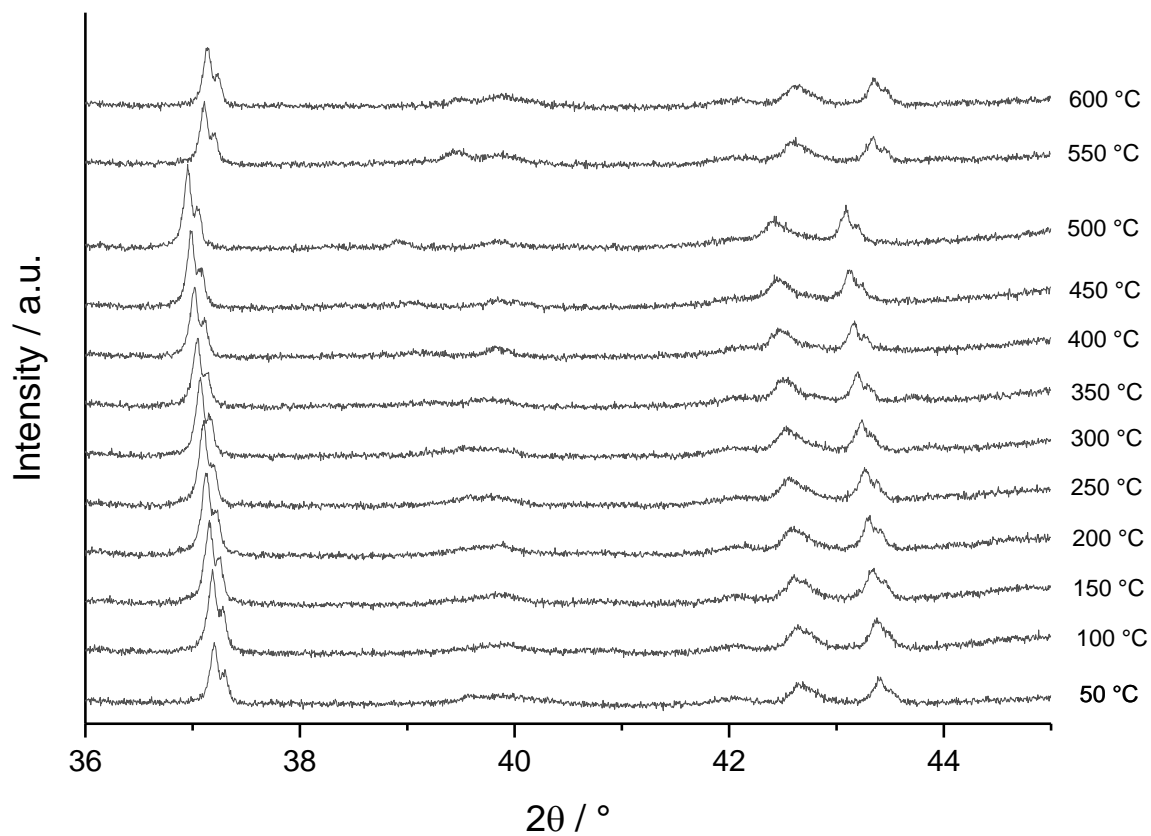

Figure S8. 2%Ag-10%K/CZA

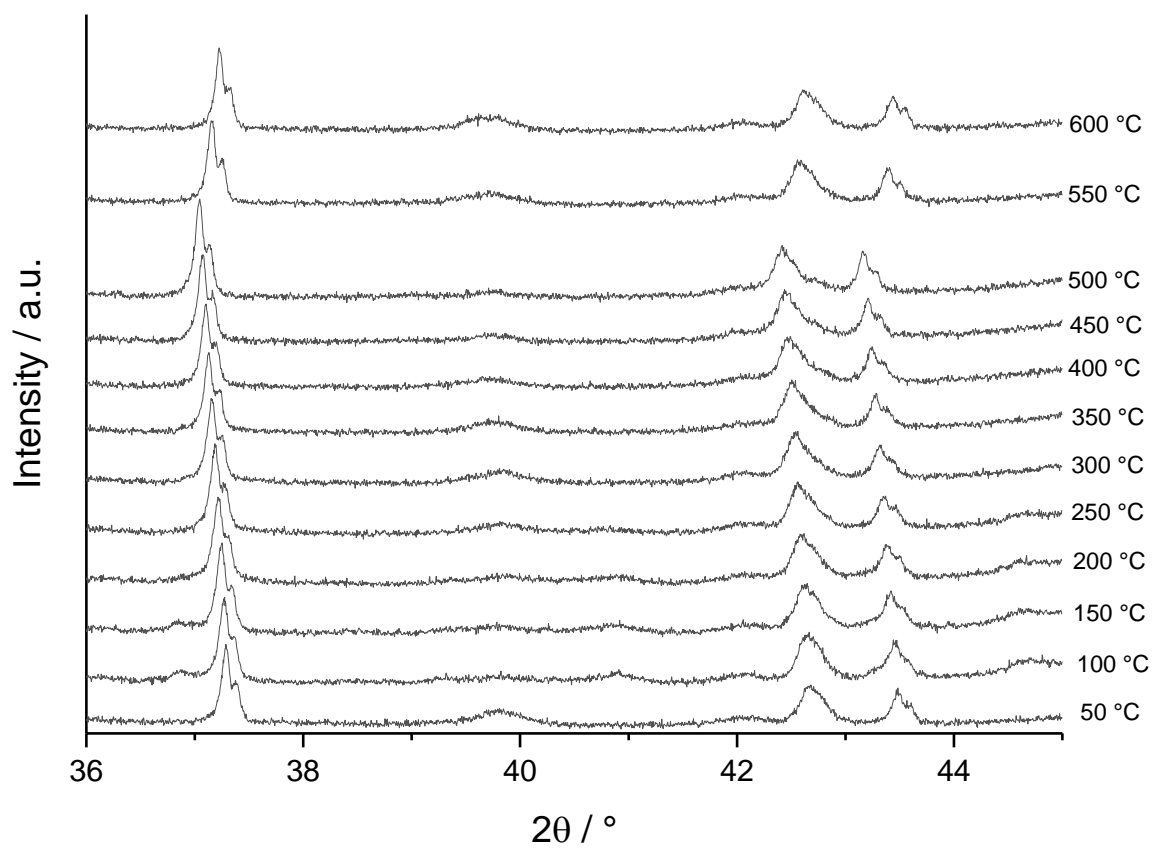

**Figure S9.** 2%Ag-15%K/CZA
